# Supplementary material for: GALNT2 sustains glioma stem cells by promoting CD44 expression
Source: publisher site journal article supplement (doi:10.18632/aging.204609), 2023-03-25
Supplement: Supplementary file [file aging-v15i6-204609-supplementary-material-SD1.pdf]

SUPPLEMENTARY FIGURES

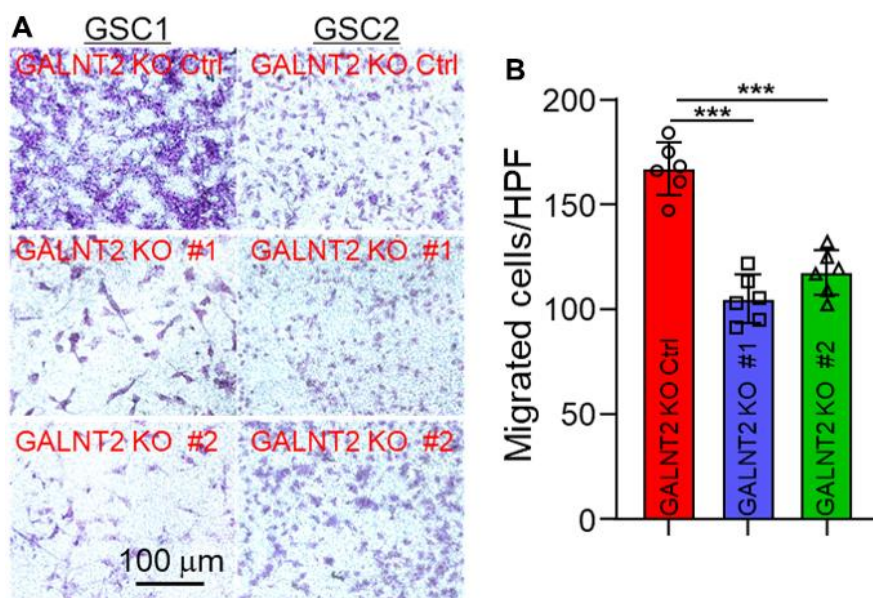

**Supplementary Figure 1. GALNT2 ablation impairs GSC migration.** (A) Representative images of migrated GSCs of indicated group. Scale bar: 100 μm. (B) Quantifications of (A). \*\*\* p < 0.001.

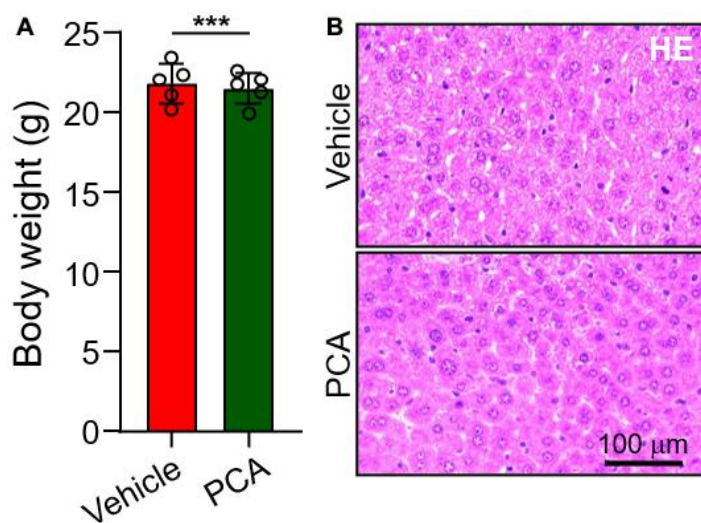

**Supplementary Figure 2. PCA did not exert a significant influence on general animal health.** (A) Body weight of mice treated with vehicle control (1% DMSO) or PCA. (B) HE staining of liver of mice treated with vehicle control or PCA.
